# Supplementary material
Source: MDPI journal article supplement (https://www.mdpi.com/2673-4117/2/4/33)
Supplement: s1 [file s1]

Archive with 1 entries (1 files):
- eng-1420274-supplementary.pdf
